# Supplementary material for: Controlled deposition of palladium nanodendrites on the tips of gold nanorods and their enhanced catalytic activity
Source: Royal Society of Chemistry journal article supplement (doi:10.1039/c7nr04046f), 2017-01-01
Supplement: c7nr04046f1.pdf [file c7nr04046f1.pdf]

Electronic Supplementary Information (ESI)

**Controlled deposition of palladium nanodendrites on tips of gold  
nanorods and their enhanced catalytic activity†**

Gaoxing Su,<sup>\*ab</sup> Huaqiao Jiang,<sup>ab</sup> Hongyan Zhu,<sup>b</sup> Jing-Jing Lv,<sup>a</sup> Guohai Yang,<sup>a</sup> Bing Yan<sup>\*c</sup>  
and Jun-Jie Zhu<sup>\*a</sup>

---

<sup>a</sup>*State Key Laboratory of Analytical Chemistry for Life Science, School of Chemistry  
and Chemical Engineering, Nanjing University, Nanjing 210093, P. R. China. E-mail:  
jjzhu@nju.edu.cn*

<sup>b</sup>*School of Pharmacy, Nantong University, Nantong 226001, P. R. China. E-mail:  
sugaoxing@ntu.edu.cn*

<sup>c</sup>*School of Environmental Science and Engineering, Shandong University, Jinan  
250100, P. R. China. E-mail: drbingyan@yahoo.com*

**Synthesis of AuNR-2<sup>1</sup>:** CTAB (9.8 mL, 0.1 M) was added to 0.20 mL of 0.0040 M AgNO<sub>3</sub> solution. To this solution, 0.5 mL of 10 mM HAuCl<sub>4</sub> was added, and after gentle mixing of the solution 70  $\mu$ L of 0.0788 M ascorbic acid was added. The final step was the addition of 12  $\mu$ L of the seed solution to the growth solution at 25 °C. The mixture was kept quietly for 12 h. After centrifugation and washing twice, AuNR-2 was obtained.

**Synthesis of AuNR-3<sup>2</sup>:** The seed solution was prepared mixing 0.6 mL of fresh prepared 0.01 M NaBH<sub>4</sub> with 5 mL of 0.5 mM HAuCl<sub>4</sub> and 5 mL of 0.2 M CTAB solution. The seed solution was aged at room temperature for 30 min after 2 min stir. To prepare the growth solution, 4.5 g of CTAB and 0.617 g of sodium oleate were dissolved in 125 mL water at 50 °C. Then 12 mL of 4 mM AgNO<sub>3</sub> was added after the solution was cooled down to 30 °C. The solution was then kept undisturbed for 15 min, and after that 125 mL of 1 mM HAuCl<sub>4</sub> was added. 1 mL of concentrated HCl was added after 90 min of gentle stirring. After 15 min, 625  $\mu$ L of 0.064 M ascorbic acid was added and stirred for 30 s. At last, 150  $\mu$ L of seed solution was added and further stirred for 30 s. The solution was kept at 30 °C for 12 h and then centrifuged and washed with water once. The obtained AuNR-3 were finally dispersed in 20 mL of water.

#### **Reference:**

- (1) Nikoobakht, B.; El-Sayed, M. A.: Preparation and growth mechanism of gold nanorods (NRs) using seed-mediated growth method. *Chemistry of Materials* **2003**, *15*, 1957-1962.
- (2) Ye, X.; Zheng, C.; Chen, J.; Gao, Y.; Murray, C. B.: Using binary surfactant mixtures to simultaneously improve the dimensional tunability and monodispersity in the seeded growth of gold nanorods. *Nano letters* **2013**, *13*, 765-771.

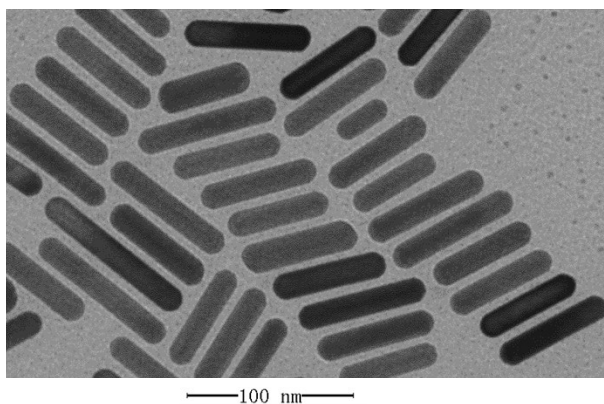

Fig. S1. TEM image of AuNR-1.

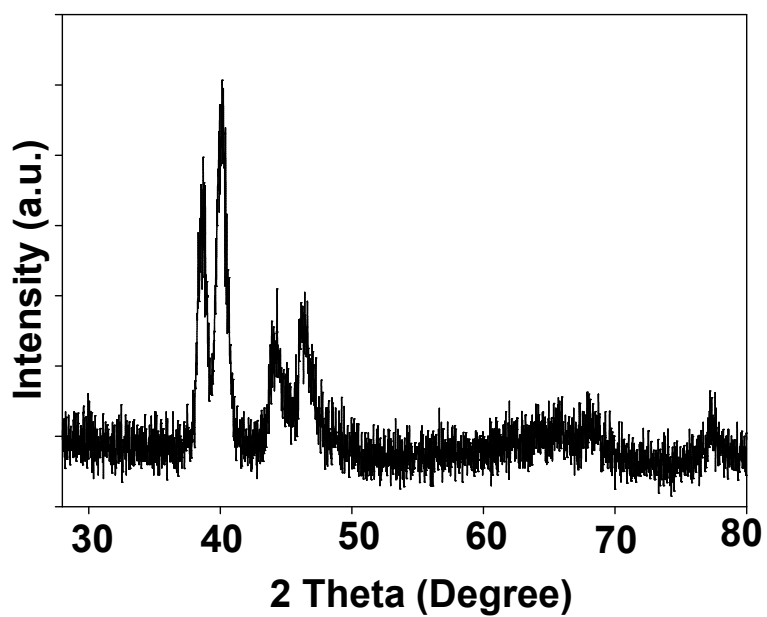

Fig. S2. XRD pattern of as-synthesized PdND-T-AuNRs.  $\text{H}_2\text{PdCl}_4$  solution (26  $\mu\text{L}$ , 10 mM) and AA (13  $\mu\text{L}$ , 0.1 M) were added nine times sequentially into CTAC solution at room temperature.

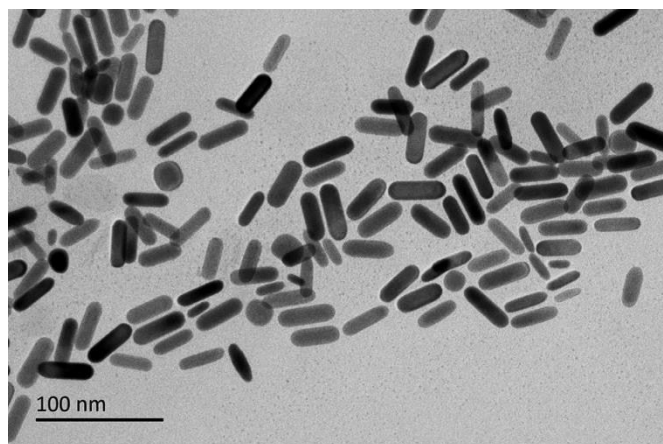

Fig. S3. TEM image of AuNR-2.

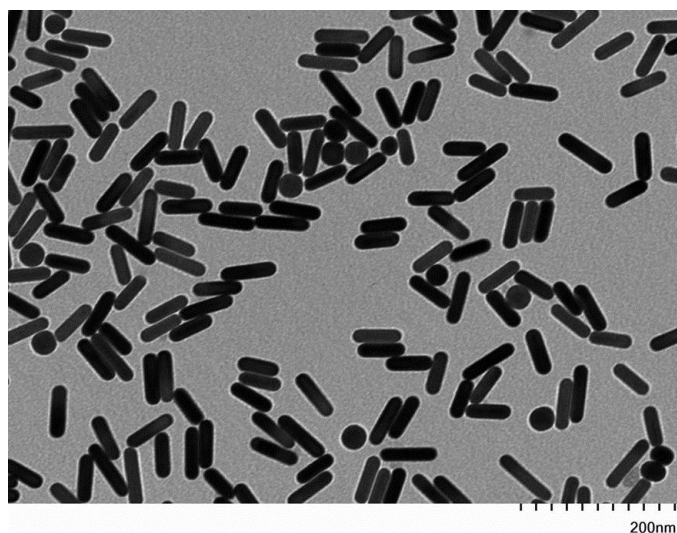

Fig. S4. TEM image of AuNR-3.

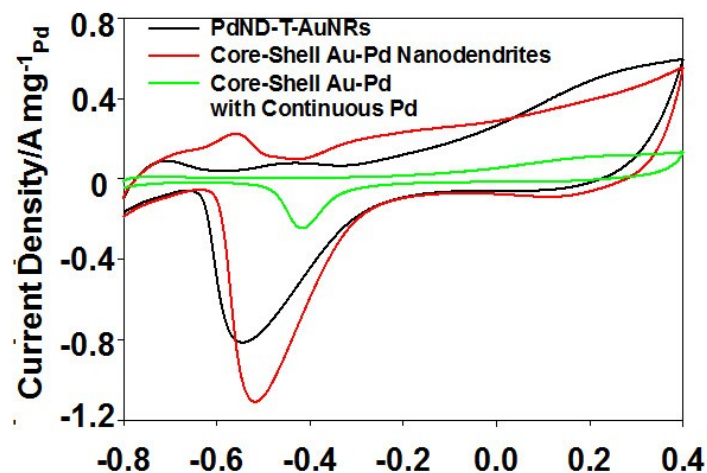

Fig. S5. CVs of PdND-T-AuNRs (black line), core-shell Au-Pd nanodendrites (red line), and core-shell Au-Pd nanocrystals with continuous palladium layer (green line) at 50 mV s<sup>-1</sup> in 1.0 M KOH.

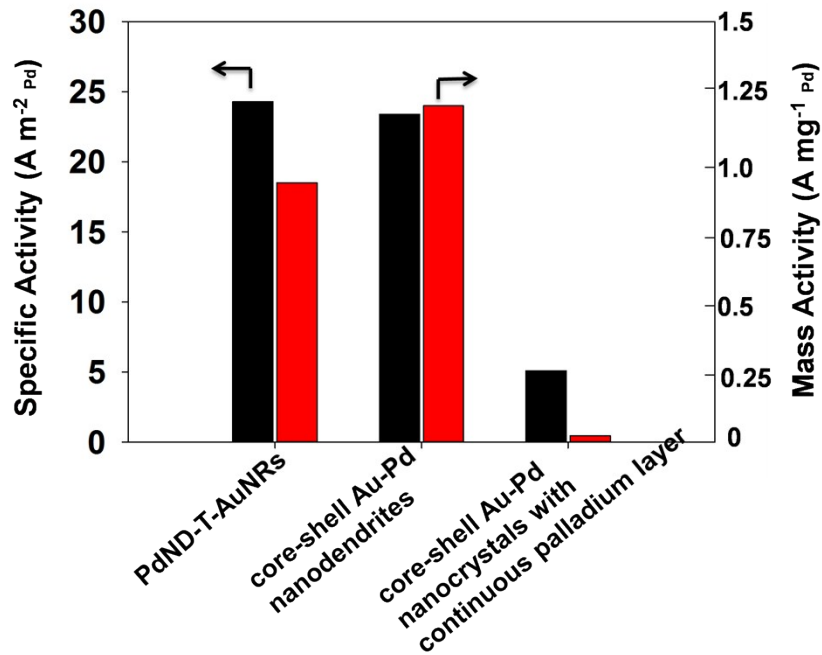

Fig. S6. Comparison of specific activity and mass activity of three different catalysts for ethanol electrooxidation at -0.11 V.

Table S1. Yields and TOFs of Suzuki coupling reactions catalyzed by PdND-T-AuNRs<sup>a</sup>

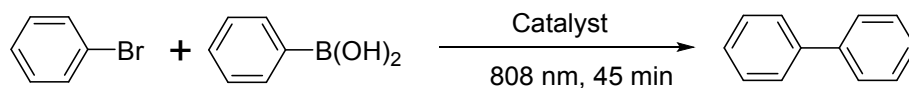

| Entry | Catalysts     | Pd Amounts <sup>b</sup><br>(mmol) | Au:Pd <sup>b</sup> | Yields<br>(%) | TOF<br>(h <sup>-1</sup> ) |
|-------|---------------|-----------------------------------|--------------------|---------------|---------------------------|
| 1     | AuNRs         | 0                                 | 0                  | Trace         | 0                         |
| 2     | PdND-T-AuNR-1 | $3.5 \times 10^{-5}$              | 1:0.64             | 12            | 457                       |
| 3     | PdND-T-AuNR-2 | $7.3 \times 10^{-5}$              | 1:1.3              | 32            | 584                       |
| 4     | PdND-T-AuNR-3 | $1.1 \times 10^{-4}$              | 1:2.0              | 65            | 788                       |
| 5     | PdND-T-AuNR-6 | $2.9 \times 10^{-4}$              | 1:5.3              | 99            | 455                       |
| 6     | PdND-T-AuNR-9 | $3.8 \times 10^{-4}$              | 1:7.0              | 99            | 347                       |

<sup>a</sup>Reaction conditions: bromobenzene (10.5  $\mu\text{L}$ , 0.1 mmol), phenylboronic acid (13.6 mg, 0.1 mmol), NaOH (12 mg, 0.3 mmol), CTAB (18.4 mg, 0.05 mmol), catalysts (0.2 mL) with constant gold content.  $\text{H}_2\text{O}$  (1.8 mL). 808 nm laser ( $0.6 \text{ W/cm}^2$ ), room temperature, 45 min.

<sup>b</sup>Determined by ICP-OES.

Table S2. Conversion and selectivity of Suzuki coupling reactions of benzyl halides and phenylboronic acid with different substitutes<sup>a</sup>

| Entry | Aryl Halides                                                                        | Coupling Product                                                                    | Conversion (%) | Selectivity (%) |
|-------|-------------------------------------------------------------------------------------|-------------------------------------------------------------------------------------|----------------|-----------------|
| 1     | 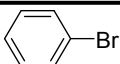   |    | 100            | 99              |
| 2     |    |    | 78             | 82              |
| 3     |    |    | 100            | 99              |
| 4     |    |    | 53             | 93              |
| 5     |    |    | 100            | 86              |
| 6     |    |    | 99             | 94              |
| 7     |    |    | 17             | 100             |
| 8     |   |   | 92             | 96              |
| 9     |  |  | 100            | 99              |
| 10    |  |  | 100            | 98              |
| 11    |  |  | 100            | 99              |

<sup>a</sup>Reaction conditions: aryl halides (0.1 mmol), substituted phenylboronic acids (0.1 mmol), NaOH (12 mg, 0.3 mmol), CTAB (18.4 mg, 0.05 mmol), PdND-T-AuNRs (0.2 mL, containing  $2.9 \times 10^{-4}$  mmol of palladium). H<sub>2</sub>O (1.8 mL). 808 nm laser (0.6 W/cm<sup>2</sup>), room temperature, 45 min.
